# Supplementary material for: All-trans Retinoic Acids Synergistically and Beneficially Affect In Vitro Glaucomatous Trabecular Meshwork (TM) Models Using 2D and 3D Cell Cultures of Human TM Cells
Source: MDPI journal article supplement (doi:10.3390/ijms23179912), 2022-08-31
Supplement: s1 [file s1]

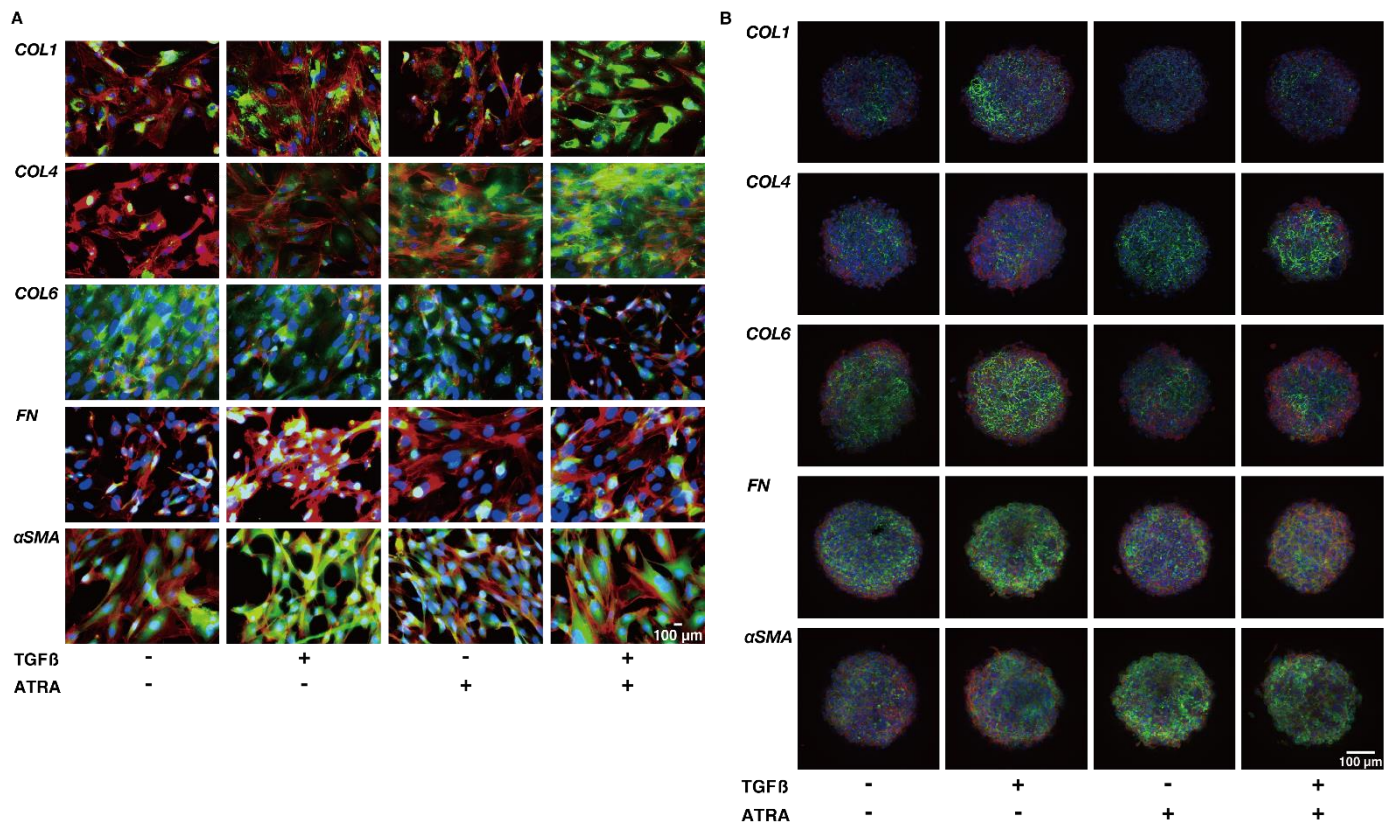

**Supplemental Figure S1. Effects of ATRA on the immunolabeling of ECM proteins of the TGF-β2 untreated or treated 2D and 3D HTM cells.**

2D and 3D HTM cells untreated and treated with TGF-β2 (TGFβ, 5 ng/ml) were subjected to immunolabeling for *COL 1*, *COL 4*, *COL 6*, *FN* and *αSMA* in the presence or absence of 10 μM ATRA. Experiments were repeated in duplicate (n=5 in each, total n=10). Representative merged images of ECM staining (green) with DAPI (blue) and Phalloidin (red) are shown in panels A (2D) and B (3D).

**Supplemental Table S1 Sequences of primers of qPCR**

|                            |         | Sequence                                                | Exon Location | RefSeq Number | Product Length (bp) |
|----------------------------|---------|---------------------------------------------------------|---------------|---------------|---------------------|
| human RPLP0 <sup>*1</sup>  | Probe   | 5'-/56-FAM/CCCTGTCTT/ZEN/CCCTGGGCATCAC/3IABkFQ/-3'      | 2-3           | NM_001002     | 143                 |
|                            | Primer2 | 5'-TCGTCTTTAAACCCGTGCGTG-3'                             |               |               |                     |
|                            | Primer1 | 5'-TGTCTGCTCCCACAATGAAAC-3'                             |               |               |                     |
| human COL1A1 <sup>*1</sup> | Probe   | 5'-/56-FAM/TCGAGGGCC/ZEN/AAGACGAAGACATC/3IABkFQ/-3'     | 1-2           | NM_000088     | 115                 |
|                            | Primer2 | 5'-GACATGTTTCAGCTTTGTGGAC-3'                            |               |               |                     |
|                            | Primer1 | 5'-TTCTGTACGCAGGTGATTGG-3'                              |               |               |                     |
| human COL4A1 <sup>*1</sup> | Probe   | 5'-/56-FAM/TCATACAGA/ZEN/CTTGGCAGCGGCT/3IABkFQ/-3'      | 51-52         | NM_001845     | 142                 |
|                            | Primer2 | 5'-AGAGAGGAGCGAGATGTTCA-3'                              |               |               |                     |
|                            | Primer1 | 5'-TGAGTCAGGCTTCATTATGTTCT-3'                           |               |               |                     |
| human COL6A1 <sup>*1</sup> | Probe   | 5'-/56-FAM/CAGGTTTCG/ZEN/GTCACAGCGGTAGT/3IABkFQ/-3'     | 2-3           | NM_001848     | 114                 |
|                            | Primer2 | 5'-CCTCGTGGACAAAGTCAAGT-3'                              |               |               |                     |
|                            | Primer1 | 5'-GTGAGGCCTTGATGATCTC-3'                               |               |               |                     |
| human FN1 <sup>*1</sup>    | Probe   | 5'-/56-FAM/TACAGCTTA/ZEN/TTCTCCCTCGCCCAG/3IABkFQ/-3'    | 3-4           | NM_212482     | 129                 |
|                            | Primer2 | 5'-CGTCCTAAAGACTCCATGATCTG-3'                           |               |               |                     |
|                            | Primer1 | 5'-ACCAATCTTGTAGGACTGACC-3'                             |               |               |                     |
| human αSMA <sup>*1</sup>   | Probe   | 5'-/56-FAM/AGACCCTGT/ZEN/TCCAGCCATCCTTC/3IABkFQ/-3'     | 8-9           | NM_001613     | 105                 |
|                            | Primer2 | 5'-AGAGTTACGAGTTGCCTGATG-3'                             |               |               |                     |
|                            | Primer1 | 5'-CTGTTGTAGGTGGTTTCATGGA-3'                            |               |               |                     |
| human TIMP1 <sup>*1</sup>  | Probe   | 5'-/56-FAM/TCAACCAGA/ZEN/CCACCTTATACCAGCG/3IABkFQ/-3'   | 2-4           | NM_003254     | 121                 |
|                            | Primer2 | 5'-CCTTCTGCAATTCGACCT-3'                                |               |               |                     |
|                            | Primer1 | 5'-GCTTGGAACCCCTTATACATCTTG-3'                          |               |               |                     |
| human TIMP2 <sup>*1</sup>  | Probe   | 5'-/56-FAM/TCTCATTGC/ZEN/AGGAAAGGCCGAGG/3IABkFQ/-3'     | 3-4           | NM_003255     | 133                 |
|                            | Primer2 | 5'-GACGTTGGAGGAAAGAAGGA-3'                              |               |               |                     |
|                            | Primer1 | 5'-TGTGGTTCAGGCTCTTCTTC-3'                              |               |               |                     |
| human TIMP3 <sup>*1</sup>  | Probe   | 5'-/56-FAM/CCTCCTTTA/ZEN/CCAGCTTCTTCCCCAC/3IABkFQ/-3'   | 1-3           | NM_000362     | 112                 |
|                            | Primer2 | 5'-CCTTCTGCAACTCCGACATC-3'                              |               |               |                     |
|                            | Primer1 | 5'-CGGTACATCTTCATCTGCTTGA-3'                            |               |               |                     |
| human TIMP4 <sup>*1</sup>  | Probe   | 5'-/56-FAM/ACTGAGGAC/ZEN/CTGACCAGTCAAGAGA/3IABkFQ/-3'   | 3-4           | NM_003256     | 149                 |
|                            | Primer2 | 5'-GGTTTGAGAAAGTCAAGGATGTTTC-3'                         |               |               |                     |
|                            | Primer1 | 5'-GTTGCACAGATGGATGAAGAC-3'                             |               |               |                     |
| human MMP2 <sup>*1</sup>   | Probe   | 5'-/56-FAM/TTCTGTCCCC/ZEN/CATGAAGCCCTGTTC/3IABkFQ/-3'   | 6-7           | NM_004530     | 140                 |
|                            | Primer2 | 5'-TCCACCACCTACAACCTTTGAG-3'                            |               |               |                     |
|                            | Primer1 | 5'-GTGCAGCTGTCATAGGATGT-3'                              |               |               |                     |
| human MMP9 <sup>*1</sup>   | Probe   | 5'-/56-FAM/CCAGGAGGA/ZEN/AAGGCGTGTGC/3IABkFQ/-3         | 3-4           | NM_004994     | 123                 |
|                            | Primer2 | 5'-ACATCGTCATCCAGTTTGGTG-3'                             |               |               |                     |
|                            | Primer1 | 5'-CGTCGAAATGGGCGTCT-3'                                 |               |               |                     |
| human MMP14 <sup>*1</sup>  | Probe   | 5'-/56-FAM/TTGTTCCCTC/ZEN/AAAGTGCCTGTTTGCTC/3IABkFQ/-3  | 1-1           | NM_004995     | 114                 |
|                            | Primer2 | 5'-TTCGCCGACTAAGCAGAAG-3'                               |               |               |                     |
|                            | Primer1 | 5'-CTTGAATTCCTAGACCGCTGT-3'                             |               |               |                     |
| human ZO1 <sup>*1</sup>    | Probe   | 5'-/56-FAM/ACTGAATTA/ZEN/CCTTCACCATGTGCTCCC/3IABkFQ/-3' | 24-25         | NM_175610     | 117                 |
|                            | Primer2 | 5'-CGCGTCTCTCCACATACATTC-3'                             |               |               |                     |
|                            | Primer1 | 5'-GCTGGCTTATTCTGAGATGGA-3'                             |               |               |                     |
| human CLDN11 <sup>*1</sup> | Probe   | 5'-/56-FAM/TGACTGCCT/ZEN/GCTTTGTGCTACGT/3IABkFQ/-3'     | 2-3           | NM_001185056  | 129                 |
|                            | Primer2 | 5'-CATGGATTTCAGAACCTGCATT-3'                            |               |               |                     |
|                            | Primer1 | 5'-GGAAGAACAGTCAGCAGCA-3'                               |               |               |                     |
| human Grp78 <sup>*2</sup>  | Forward | 5'-CATCACGCCGTCCTATGTCG-3'                              |               | NM_005347     | 215                 |
|                            | Reverse | 5'-CGTCAAAGACCGTGTCTCG-3'                               |               |               |                     |
| human GRP94 <sup>*2</sup>  | Forward | 5'-CTGGGACTGGGAACTTATGAATG-3'                           |               | NM_003299     | 152                 |
|                            | Reverse | 5'-TCCATATTCGTCAAACAGACCAC-3'                           |               |               |                     |
| human XBP <sup>*2</sup>    | Forward | 5'-AGTAGCAGCTCAGACTGCCA-3'                              |               | NM_005080     | 313                 |
|                            | Reverse | 5'-CCTGGTTCTCAACTACAAGGC-3'                             |               |               |                     |
| human sXBP <sup>*2</sup>   | Forward | 5'-GGTCTGCTGAGTCCGCAGCAGG-3'                            |               | AB076384      | 97                  |
|                            | Reverse | 5'-GGGCTTGGTATATATGTGG-3'                               |               |               |                     |
| human CHOP <sup>*2</sup>   | Forward | 5'-GGAGAACCAGGAAACGGAAAC-3'                             |               | NM_004083     | 69                  |
|                            | Reverse | 5'-TCTCCTTCATGCGCTGCTTT-3'                              |               |               |                     |

\*1 Taqman probes (IDT, Coralville, IA, USA). \*2 SYBR probes (IDT, Coralville, IA, USA).
